# Supplementary material
Source: publisher figshare collection journal article supplement (https://acs.figshare.com/ndownloader/files/24155573)
Supplement: Supplementary file 1 [file 24155573]

## Supporting Information

### **Entropy-Driven Assembly of Nanoparticles within Emulsion-Evaporative Block Copolymer Particles: Crusted, Seeded, and Alternate-Layered Onions**

*Meng Xu<sup>1</sup>, Kang Hee Ku<sup>1</sup>, Young Jun Lee<sup>1</sup>, Jaeman J. Shin<sup>1</sup>, Eun Ji Kim<sup>1</sup>, Se Gyu Jang<sup>2</sup>, Hongseok Yun<sup>\*1</sup>, and Bumjoon J. Kim<sup>\*1</sup>*

<sup>1</sup>Department of Chemical and Biomolecular Engineering, Korea Advanced Institute of Science and Technology (KAIST), Daejeon 34141, Republic of Korea

<sup>2</sup>Functional Composite Materials Research Center, Korea Institute of Science and Technology (KIST), Jeonbuk 55324, Republic of Korea

\* E-mail: bumjoonkim@kaist.ac.kr (B. J. K.), hongsyun@kaist.ac.kr (H. Y.)

## ■ Supporting Figures and Table

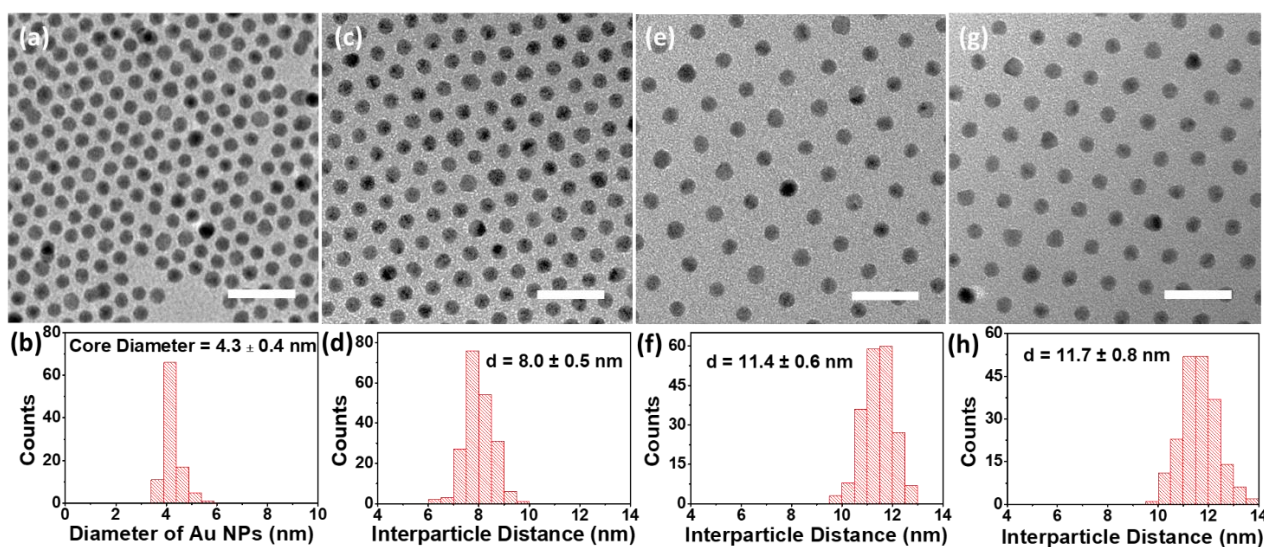

**Figure S1.** Characterization of Au@PS with different  $M_n$  of PS ligands. TEM images and histograms of (a, b) as-synthesized Au NPs, (c, d) 4Au@2kPS, (e, f) 4Au@4kPS, and (g, h) 4Au@6kPS. Scale bars are 20 nm. The average core diameter of the Au NPs was  $4.3 \pm 0.4$  nm, and the interparticle distance ( $d$ ) was  $8.0 \pm 0.5$ ,  $11.4 \pm 0.6$ , and  $11.7 \pm 0.8$  nm for 4Au@2kPS, 4Au@4kPS, and 4Au@6kPS, respectively.

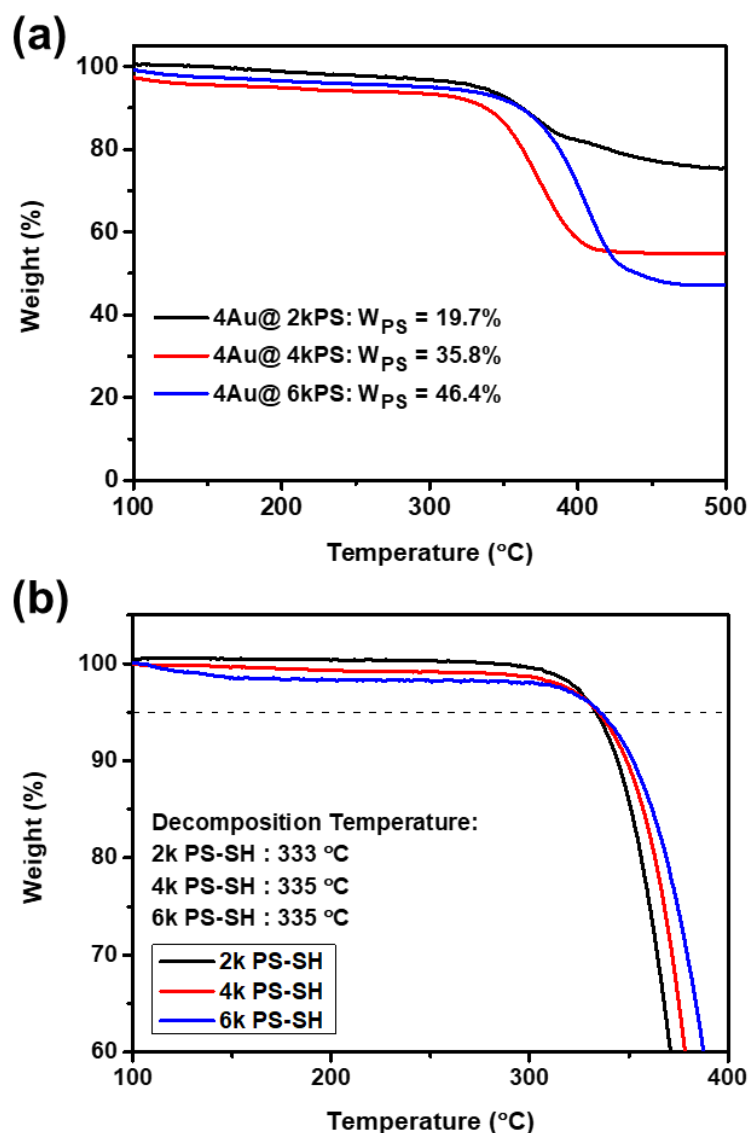

**Figure S2.** TGA analysis of (a) Au@PS and (b) only PS-SH ligands. The amount of PS-SH ligands in each sample was determined by calculating the weight loss from the thermal decomposition temperature of PS-SH (the temperature corresponding to 5 % weight loss in **Figure S2b**) to the temperature at which weight % reaches its minimum.

## ■ Calculation of Minimum Grafting Density Fully Covering the NP Surface.

The theoretical minimum value of grafting density for PS-SH ligands to effectively shield the gold surface from interacting with P4VP blocks can be calculated as<sup>1</sup>:

$$\Sigma_{\min} = \frac{1}{\pi} \left( \frac{R + R_g}{R_g R} \right)^2$$

where  $R$  is the radius of Au NP core, and the radius of gyration  $R_g = 1.15$  nm for 2k PS-SH,  $R_g = 1.78$  nm for 4k PS-SH, and  $R_g = 2.18$  nm for 6k PS-SH.

**Table S1.** Detailed information of Au@PS used in this study.

| PS-grafted<br>Au NP | Core Diameter<br>(nm) | Ligand<br>$M_n$ (kg mol <sup>-1</sup> ) | Overall Size<br>$d$ (nm) | $d/L_{PS}$<br>( $L_{PS}=10.2$<br>$\pm 1.8$ nm) | Grafting Density<br>$\sigma$ (chains nm <sup>-2</sup> ) |
|---------------------|-----------------------|-----------------------------------------|--------------------------|------------------------------------------------|---------------------------------------------------------|
| 4Au@2kPS            | 4.3 $\pm$ 0.3         | 1.8                                     | 8.0 $\pm$ 0.5            | 0.78                                           | 1.14                                                    |
| 4Au@4kPS            | 4.3 $\pm$ 0.3         | 4.3                                     | 11.4 $\pm$ 0.6           | 1.12                                           | 1.08                                                    |
| 4Au@6kPS            | 4.3 $\pm$ 0.3         | 6.4                                     | 11.7 $\pm$ 0.8           | 1.15                                           | 1.13                                                    |

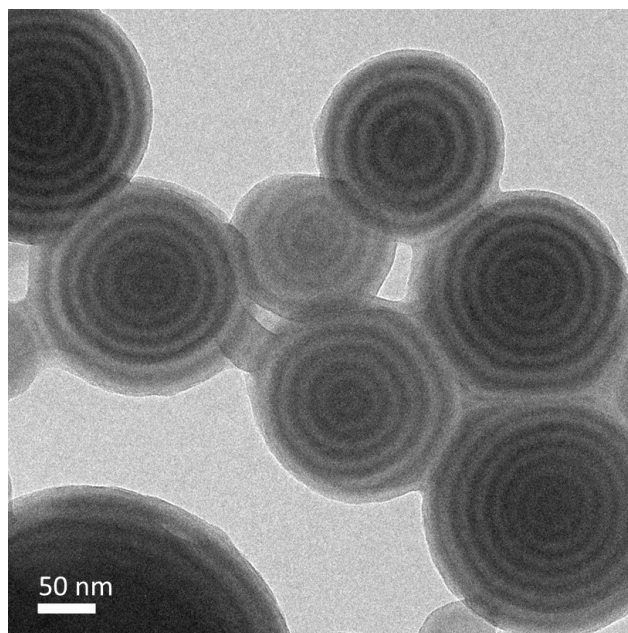

**Figure S3.** TEM image of pristine PS-*b*-P4VP particles.

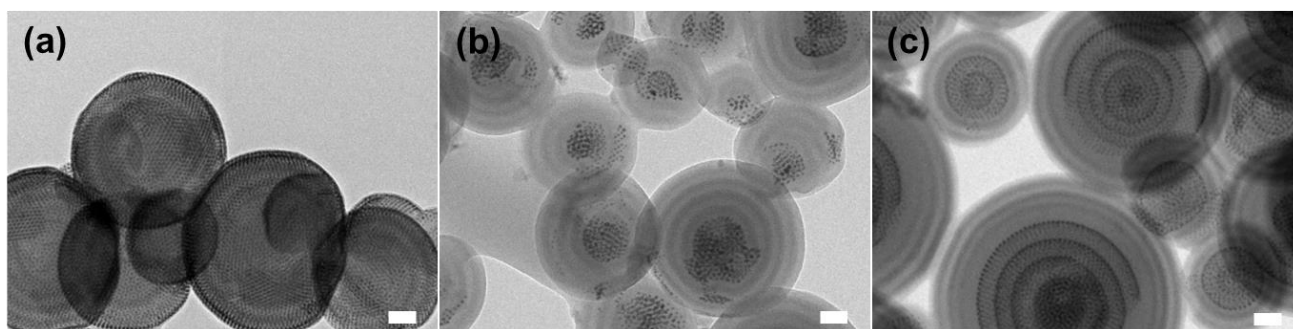

**Figure S4.** Low-magnification TEM images of PS-*b*-P4VP/Au@PS hybrid particles. TEM images of PS-*b*-P4VP particles containing (a) 4Au@2kPS, (b) 4Au@4kPS, and (c) 4Au@6kPS. Scale bars are 50 nm.

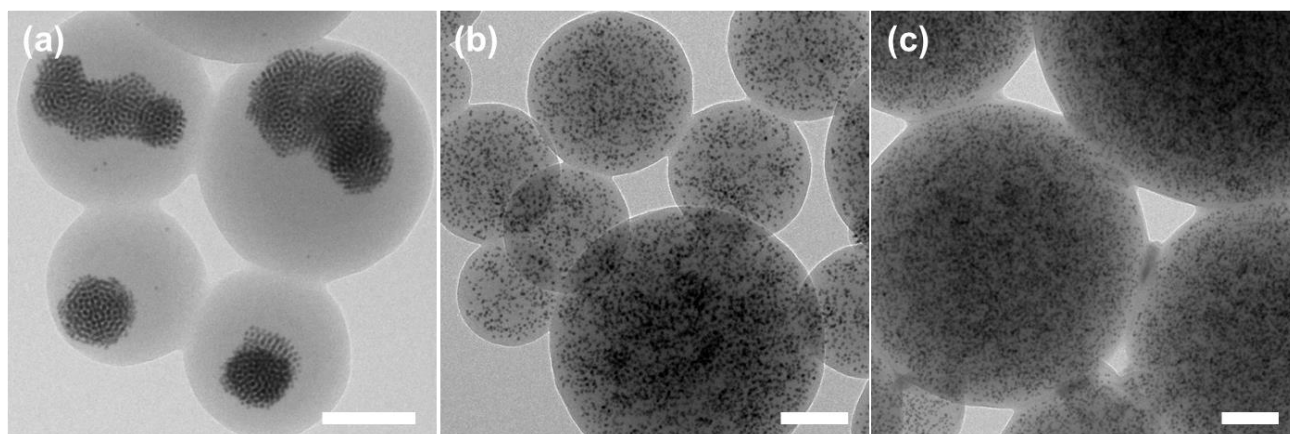

**Figure S5.** Characterization of Au@PS within a homopolymer PS (hPS) matrix. TEM images of (a) 9khPS/4Au@2kPS, (b) 9khPS/4Au@4kPS, and (c) 9khPS/4Au@6kPS hybrid particles. Scale bars are 100 nm.

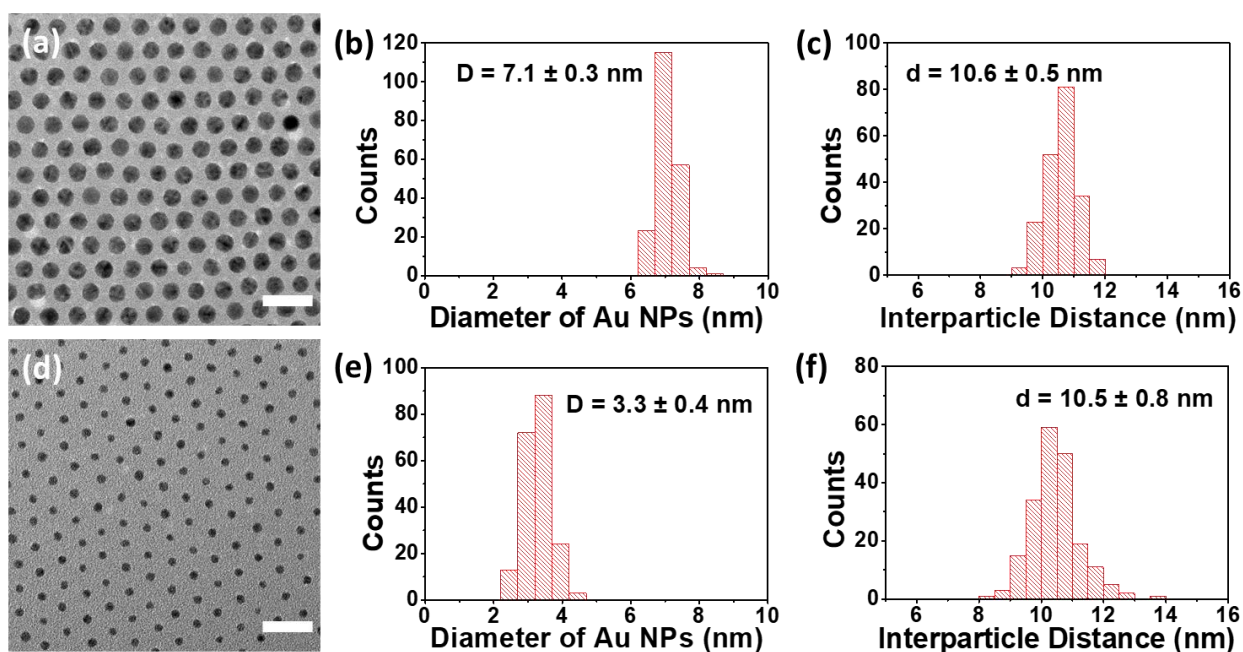

**Figure S6.** Characterization of Au@PS with different core sizes and  $M_n$  of ligands. TEM images and histograms of (a, b, and c) 7Au@2kPS, and (d, e, and f) 3Au@6kPS. Scale bars are 20 nm.

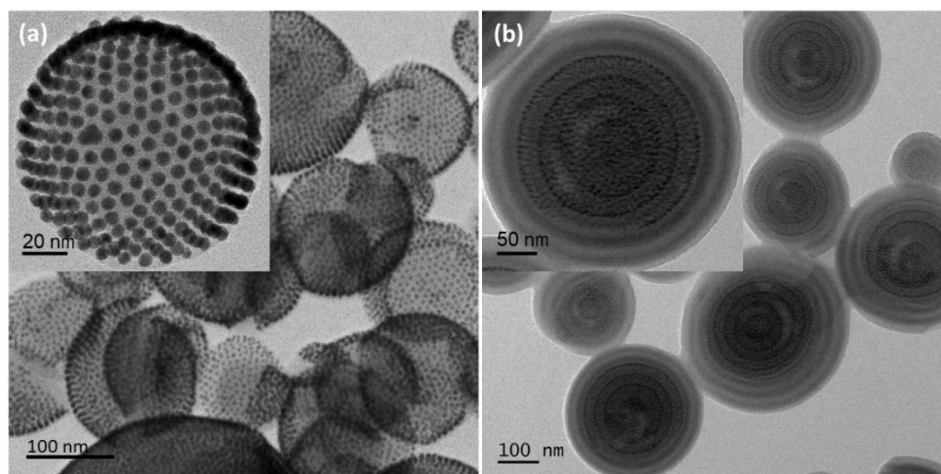

**Figure S7.** Effect of  $P/N$  values on Au@PS assembly within BCP particles. TEM images of PS-*b*-P4VP particles containing (a) 7Au@2kPS ( $P/N = 5.4$ ,  $d/L_{PS} = 1.04$ ) and (b) 3Au@6kPS ( $P/N = 1.5$ ,  $d/L_{PS} = 1.03$ ).



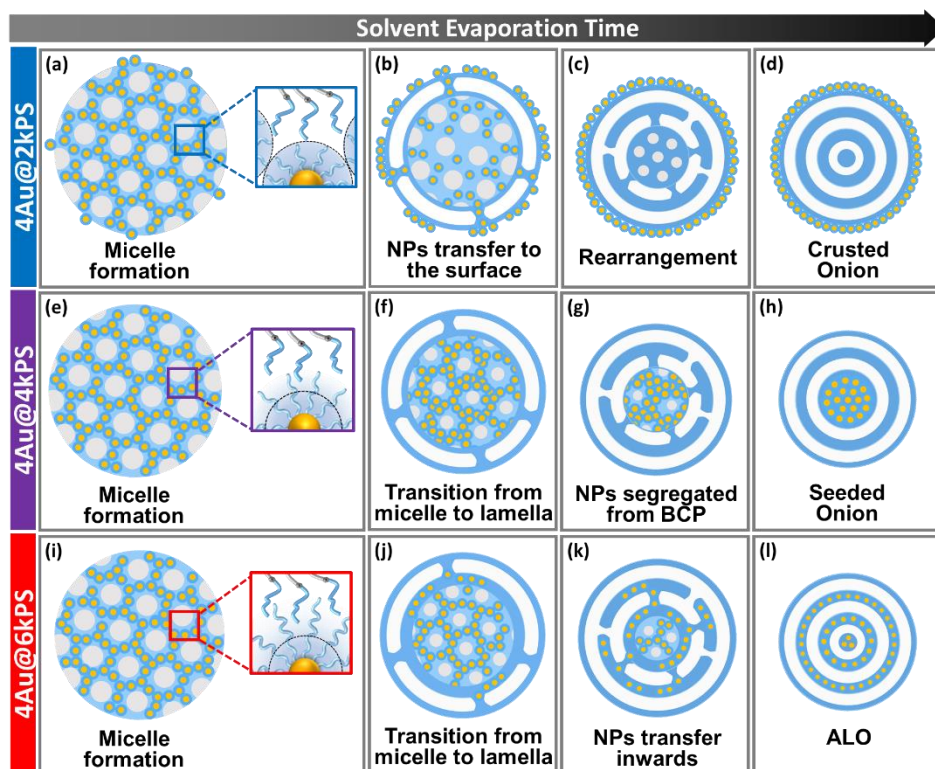

**Scheme S1.** Schematic illustration of (a-d) PS-*b*-P4VP/4Au@2kPS, (e-h) PS-*b*-P4VP/4Au@4kPS, and (i-l) PS-*b*-P4VP/4Au@6kPS particle formation process.



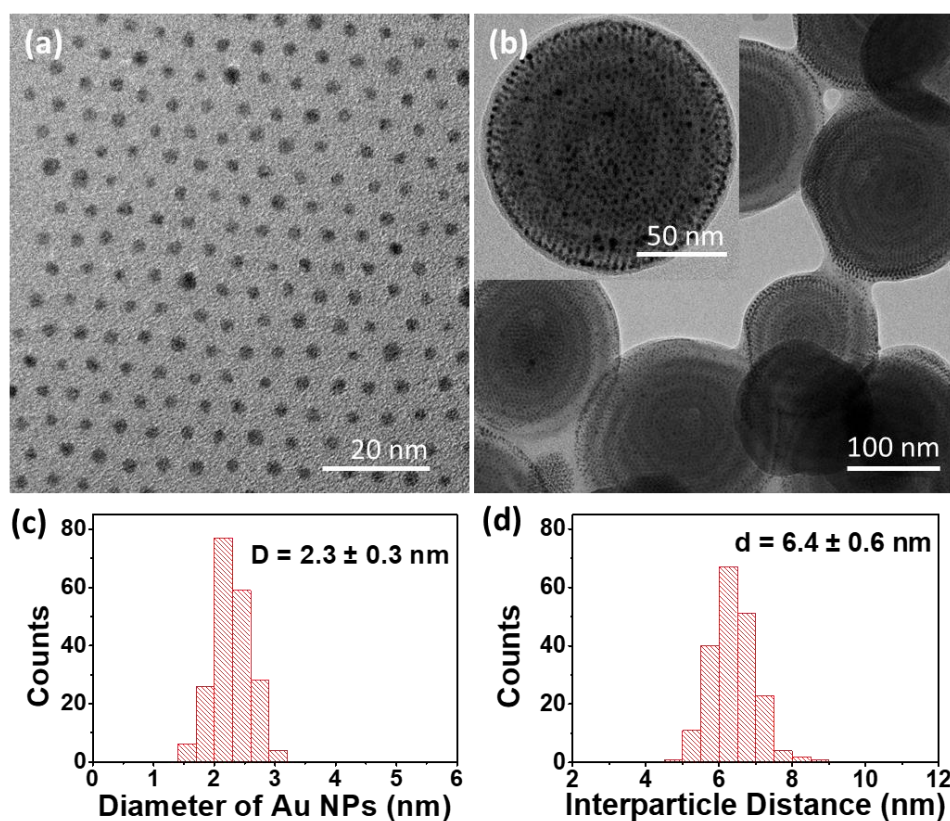

**Figure S8.** Characterization of 2Au@2kPS and the corresponding assembly structure within BCP particles. (a) TEM images and (c, d) histograms of 2Au@2kPS, and (b) TEM image of PS-*b*-P4VP particles containing 2Au@2kPS.

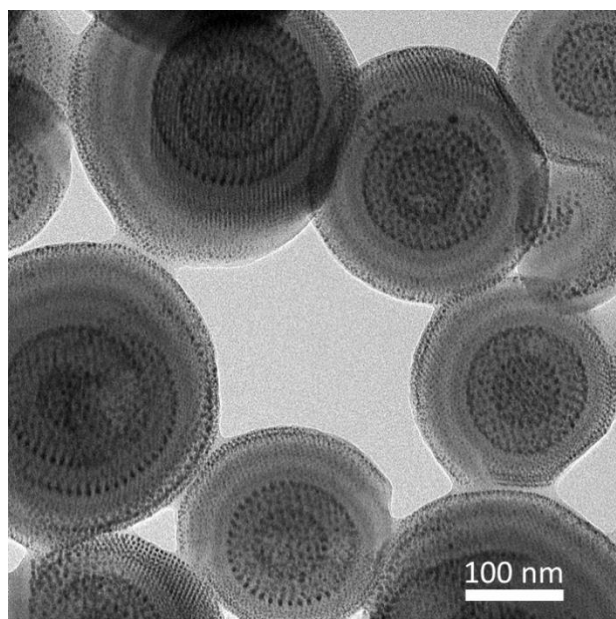

**Figure S9.** Low-magnification TEM image of PS-*b*-P4VP/Au@PS hybrid particles containing 2Au@2kPS and 4Au@6kPS.

## References

- (1) Yun, H.; Yu, J. W.; Lee, Y. J.; Kim, J.-S.; Park, C. H.; Nam, C.; Han, J.; Heo, T.-Y.; Choi, S.-H.; Lee, D. C.; Lee, W. B.; Stein, G. E.; Kim, B. J. Symmetry Transitions of Polymer-Grafted Nanoparticles: Grafting Density Effect. *Chem. Mater.* **2019**, *31*, 5264–5273.
